# Supplementary material for: Mechanical properties of freestanding few-layer graphene/boron nitride/polymer heterostacks investigated with local and non-local techniques
Source: Royal Society of Chemistry journal article supplement (doi:10.1039/d4na00514g), 2024-01-01
Supplement: d4na00514g1.pdf [file d4na00514g1.pdf]

## Supporting Information

### Mechanical properties of freestanding few-layer graphene/boron nitride/polymer heterostacks investigated with local and non-local techniques

Marcus Lespasio,<sup>a†</sup> Elena Missale,<sup>b†</sup> Bashar Aziz,<sup>a</sup> Yoosuk Kim,<sup>a</sup> Giorgio Speranza,<sup>c,d</sup> Ralu Divan,<sup>e</sup> David J. Gosztola,<sup>e</sup> Chi-Hou Lei,<sup>f</sup> Maria F. Pantano<sup>\*b</sup> and Irma Kuljanishvili<sup>\*a</sup>

<sup>a</sup>. Department of Physics, Saint Louis University, St. Louis, Missouri, 63103, USA

<sup>b</sup>. Department of Civil, Environmental and Mechanical Engineering, University of Trento, Via Mesiano 77, 38123 Trento, Italy

<sup>c</sup>. Fondazione Bruno Kessler, Via Sommarive 18, 38123 Trento, Italy

<sup>d</sup>. Department of Industrial Engineering, University of Trento, Via Sommarive 9, 38123 Trento, Italy

<sup>e</sup>. Center for Nanoscale Materials, Argonne National Laboratory, 9700 S. Cass Avenue, Lemont, IL 60439, USA

<sup>f</sup>. Department of Physics and Engineering, University of Scranton, Scranton, PA, 18510, USA

† These authors contributed equally to this work.

\*Corresponding author: [irma.kuljanishvili@slu.edu](mailto:irma.kuljanishvili@slu.edu); [maria.pantano@unitn.it](mailto:maria.pantano@unitn.it)

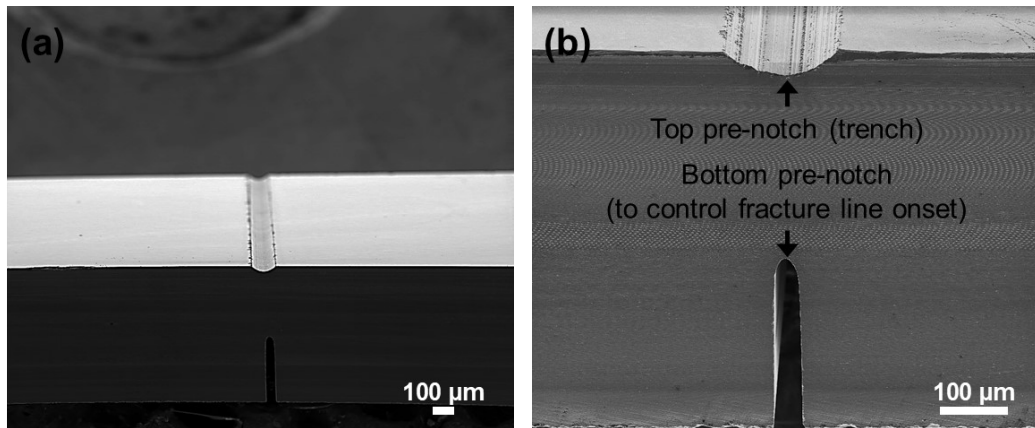

**Figure S1.** Representative SEM images of trenched substrates: (a) and (b) SEM images at different magnifications, 100X and 300X respectively, and the corresponding tilt angles of 70 and 85 degrees. Images show the double pre-notched Si substrate with a  $\sim 200\ \mu\text{m}$  wide and  $50\ \mu\text{m}$  deep trench used in all experiments.

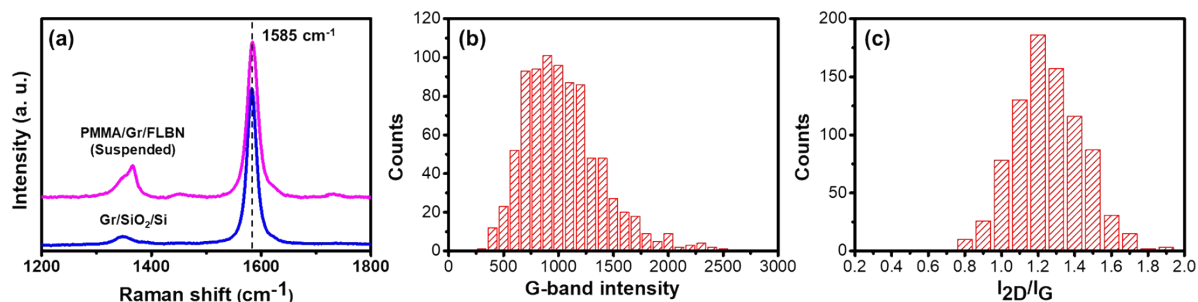

**Figure S2.** Raman spectra of Gr/SiO<sub>2</sub>/Si and PMMA/Gr/FLBN suspended heterostacks. (a) G-band peak at 1585 cm<sup>-1</sup> is designated by “a black” dashed line. Histograms of (b) G-band intensity at 1585 cm<sup>-1</sup> and (c) I<sub>2D</sub>/I<sub>G</sub> ratio. The acquired data used are extracted from the Raman mapping spectral images (shown in Fig 2c,d of the main text) of Gr in suspended PMMA/Gr/FLBN heterostacks with a total of 841 points (“counts” on y-axis depict the number of points for the indicated range).

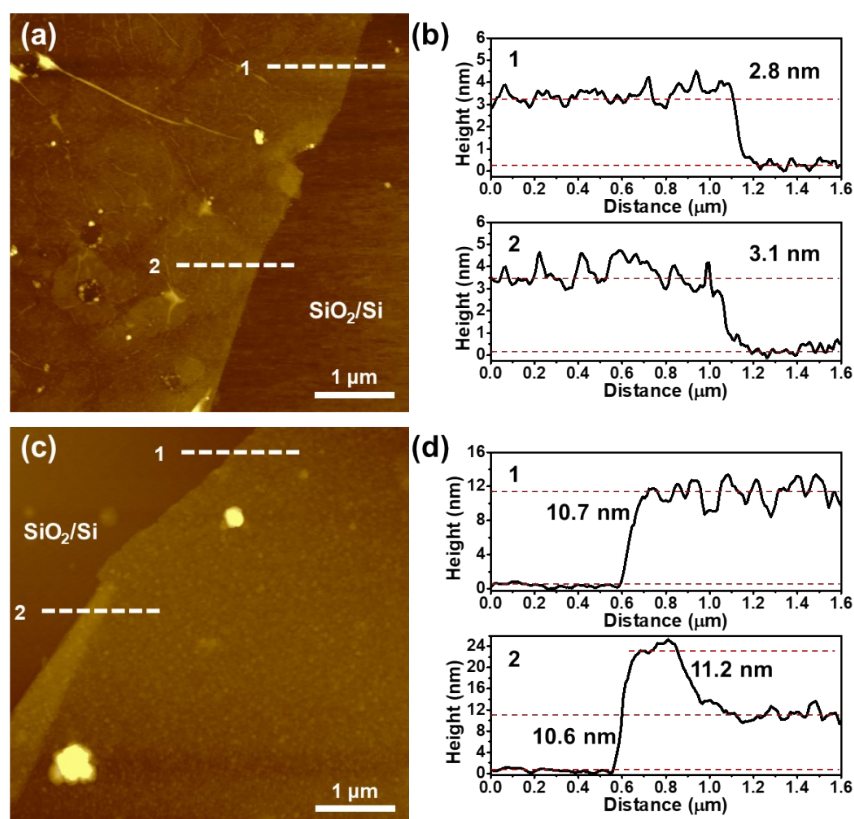

**Figure S3.** AFM height profiles of Gr and FLBN on SiO<sub>2</sub>/Si substrate reference samples: (a), (c) AFM images and (b), (d) line profiles for Gr and FLBN, respectively. The AFM images show an area of 5 μm by 5 μm. The location of the line profiles is shown as white dashed lines (1 and 2) on the AFM images. Line 2 shows a folded edge, which is sometimes observed mostly at the perimeter of the sample.
